# Supplementary material for: Selective mRNA translation during eIF2 phosphorylation induces expression of IBTKα
Source: PubMed Central journal article supplement — Mol Biol Cell. 2014 May 15;25(10):1686–97. doi: 10.1091/mbc.E14-02-0704 (PMC4019499; doi:10.1091/mbc.e14-02-0704), 2014-05-15
Supplement: supp_E14-02-0704v1_CombinedSupMats.pdf [file supp_E14-02-0704v1_CombinedSupMats.pdf]

# Supplemental Materials

*Molecular Biology of the Cell*

Baird et al.

Supplemental Table 1 Table of gene transcripts suggested to be repressed, resistant or preferentially translated in response to ER stress.
